# Supplementary material for: Genetic determinants of lactococcal C2viruses for host infection and their role in phage evolution
Source: PubMed Central journal article supplement (PMC5156332; doi:10.1099/jgv.0.000499), 2016-08
Supplement: jgv-97-1998-s001.pdf [file jgv-97-1998-s001.pdf]

**Supplementary File:** gp114-115-16 and gp34-35-36 amino acid percent identity and amino acid conservation and secondary structure alignment.

Percent amino acid identity was performed using ClustalW default parameters within Geneious (Geneious version 6.1.4, <http://www.geneious.com/>) (Kearse et al., 2012). For gp115 / gp35, the respective proteins were divided into N-terminal, middle, and C-terminal for identity determinations. Amino acid conservation and secondary structure prediction alignment was performed using PRALINE Multiple Sequence Alignment set at default parameters (<http://www.ibi.vu.nl/programs/pralinewww/>) (Simossis & Heringa, 2005). The color key for the amino acid conservation output is as shown. Alignment comparison of predicted secondary structure used DSSP (Kabsch & Sander, 1983) and PSIPRED (Jones, 1999) and was performed separately for each c2-type (gp114-115-116) and bIL67-type (gp34-35-36) group of phage proteins; color assignments are red for helix and blue for sheet.

**Jones, D.T. (1999).** Protein secondary structure prediction based on position-specific scoring matrices. *J Molec Biol* **292**,195-202.

**Kabsch, W. & Sander, C. (1983).** Dictionary of protein secondary structure: pattern recognition of hydrogen-bonded and geometrical features. *Biopolymers* **22**, 2577-637.

**Kearse, M., Moir, R., Wilson, A., Stones-Havas, S., Cheung, M., Sturrock, S., Buxton, S., Cooper, A., Markowitz, S. & other authors (2012).** Geneious Basic: an integrated and extendable desktop software platform for the organization and analysis of sequence data. *Bioinformatics* **28**, 1647-1649.

**Simossis, V.A. & Heringa, J. (2005).** PRALINE: a multiple sequence alignment toolbox that integrates homology-extended and secondary structure information. *Nucleic Acids Res* **33** (Web Server issue), W289–W294.

# gp14 – gp34 amino acid alignment / % identity

Unconserved ■■■■■■■ Conserved

```

c2      10      20      30      40      50
4412  NTFIKAVCN  SNTGRDFTIK  KPNHIVQRC  SLK-----S  IETIQVLPOH
5938  NTFIKAVCN  SNTGRDFTIK  KPNHIVQRC  SLK-----S  IETIQVLPOH
b1L67 --LNKAYTN  EKTGLDFCKE  LQPNLLTRS  NLFRLTGDTS  EEPDKFDVGY
4410  --LNKAYTN  EKTGLDFCKE  LQPNLLTRS  NLFRLTGDTS  EEPDKFDVGY
6202  --LNKAYTN  EKTGLDFCKE  LQPNLLTRS  NLFRLTGDTS  EEPDKFDVGY
6165  --LNKAYTN  EKTGLDFCKE  LQPNLLTRS  NLFRLTGDTS  ENPNDPDPGY
6162  --LNKAYTN  EKTGLDFCKE  LQPNLLTRS  NLFRLTGDTS  EEPDKFDPSH
Consistency 118511611  661511647  5161187614  718332333  5665674457
    
```

```

c2      260     270     280     290     300
4412  KVTIHAESKT  D--KELFVLE  ERGICQDAV  WCYCRPLNQR  VLIIGDSOTY
5938  KVTIHAESKT  D--KELFVLE  ERGICQDAV  WCYCRPLNQR  VLIIGDSOTY
b1L67 KDVVGGQLN  DENVYELF---  -GGDTKQAV  WCYCRPLNQR  VLIIGDSOTY
4410  KDVVGGQLN  DENVYELF---  -GGDTKQAV  WCYCRPLNQR  VLIIGDSOTY
6202  KDVVGGQLN  DENVYELF---  -GGDTKQAV  WCYCRPLNQR  VLIIGDSOTY
6165  KDVVGGQLN  DENVYELF---  -GGDTKQAV  WCYCRPLNQR  VLIIGDSOTY
6162  KDVVGGQLN  DENVYELF---  -GGDTKQAV  WCYCRPLNQR  VLIIGDSOTY
Consistency 851761756  132511111  1515511619  1196119811  1111111171
    
```

```

c2      510     520     530     540     550
4412  VENSRTRPVP  TQILFANVT  KKAILFQQQ  SNGTBSKSR  FTIPGSATAF
5938  VENSRTRPVP  TQILFANVT  KKAILFQQQ  SNGTBSKSR  FTIPGSATAF
b1L67 YDKRRTKAI  DRVLFINDKQ  KRAHLKYKN  TKSASERSV  YTI PASDAL
4410  YDKRRTKAI  DRVLFINDKQ  KRAHLKYKN  TKSASERSV  YTI PASDAL
6202  YDKRRTKAI  DRVLFINDKQ  KRAHLKYKN  TKSASERSV  YTI PASDAL
6165  YDKRRTKAI  DRVLFINDKQ  KRAHLKYKN  TKSASERSV  YTI PASDAL
6162  YDKRRTKAI  DRVLFINDKQ  KRAHLKYKN  TKSASERSV  YTI PASDAL
Consistency 8817718691  6791161565  8811187562  765717813  8791684116
    
```

```

c2      60      70      80      90     100
4412  IYL DGTGTG  ETSKRQRKK  CPDNNRPPS  YGSIITKPGQ  ENKISGLAFC
5938  IYL DGTGTG  ETSKRQRKK  CPDNNRPPS  YGSIITKPGQ  ENKISGLAFC
b1L67 YHK IIDLSEV  DRTSQF----  -PSDHRPPS  LGIRLYNPKN  ASGTWQNYWY
4410  YHK IIDLSEV  DRTSQF----  -PSDHRPPS  LGIRLYNPKN  ASGTWQNYWY
6202  YFK IINALSEV  DRTSQF----  -PSDHRPPS  LGIRLYNPKN  ASGTWQNYWY
6165  YFK IINALSEV  DRTSQF----  -PSDHRPPS  LGIRLYNPKN  ASGTWQNYWY
6162  YFK IINALSEV  DRTSQF----  -PSDHRPPS  LGIRLYNPKN  ASGTWQNYWY
Consistency 6651756757  6677761111  1618718181  6155856176  6654515484
    
```

```

c2      310     320     330     340     350
4412  DTEAGRLTKF  HVLNGSKGIF  DLITGNVTFE  QFTDKRRTFD  SDTKAIVDNR
5938  DTEAGRLTKF  HVLNGSKGIF  DLITGNVTFE  QFTDKRRTFD  SDTKAIVDNR
b1L67 TNASGRITVNF  HVLNGSKVSF  DMTGNTLYPE  QFQDARAFD  SVGNDHATIQ
4410  TNASGRITVNF  HVLNGSKVSF  DMTGNTLYPE  QFQDARAFD  SVGNDHATIQ
6202  TNASGRITVNF  HVLNGSKVSF  DMTGNTLYPE  QFQDARAFD  SVGNDHATIQ
6165  TNASGRITVNF  HVLNGSKVSF  DMTGNTLYPE  QFQDARAFD  SVGNDHATIQ
6162  TNASGRITVNF  HVLNGSKVSF  DMTGNTLYPE  QFQDARAFD  SVGNDHATIQ
Consistency 6667181761  11111111791  18181878111  1866511711  6556517651
    
```

```

c2      560     570     580     590     600
4412  ARANGIIPKN  GELKGNVMT  DKNVDFPTN  KRPIITGVKE  LFVYKIKNEV
5938  ARANGIIPKN  GELKGNVMT  DKNVDFPTN  KRPIITGVKE  LFVYKIKNEV
b1L67 LKYNTIIPKD  GAMNHIVFT  DKTNAEMLQ  IRPNWIDYE  STPKVQVDE
4410  LKYNTIIPKD  GAMNHIVFT  DKTNAEMLQ  IRPNWIDYE  STPKVQVDE
6202  LKYNTIIPKD  GAMNHIVFT  DKTNAEMLQ  IRPNWIDYE  STPKVQVDE
6165  LKYNTIIPKD  GAMNHIVFT  DKTNAEMLQ  IRPNWIDYE  STPKVQVDE
6162  LKYNTIIPKD  GAMNHIVFT  DKTNAEMLQ  IRPNWIDYE  STPKVQVDE
Consistency 6741519167  15861179961  1165876561  6115516688  5515871781
    
```

```

c2      110     120     130     140     150
4412  IDYERKQYPS  LYPNVVTPNL  TQQRKYLGS  TLVNSGVNL  EVRLKLLYGT
5938  IDYERKQYPS  LYPNVVTPNL  TQQRKYLGS  TLVNSGVNL  EVRLKLLYGT
b1L67 IHEKLP---  ----  -VKPNL  TQGRKMGVSN  RLTFGRKPL  DFHLKLLYGN
4410  IHEKLP---  ----  -VKPNL  TQGRKMGVSN  RLTFGRKPL  DFHLKLLYGN
6202  IHEKLP---  ----  -VKPNL  TQGRKMGVSN  RLTFGRKPL  DFHLKLLYGN
6165  IHEKLP---  ----  -VKPNL  TQGRKMGVSN  RLTFGRKPL  DFHLKLLYGN
6162  IHEKLP---  ----  -VKPNL  TQGRKMGVSN  RLTFGRKPL  DFHLKLLYGN
Consistency 678856111  111111111  111111111  1817187114  6141485611  8641187116
    
```

```

c2      360     370     380     390     400
4412  EPLYVDTANT  AIDCVFGEHS  SNIIIEGPNY  QADKRYRVD  VRSASVHVG
5938  EPLYVDTANT  AIDCVFGEHS  SNIIIEGPNY  QADKRYRVD  VRSASVHVG
b1L67 EPLYVDTANT  AIDCVFGEHS  SNIIIEGPNY  QADKRYRVD  VRSASVHVG
4410  EPLYVDTANT  AIDCVFGEHS  SNIIIEGPNY  QADKRYRVD  VRSASVHVG
6202  EPLYVDTANT  AIDCVFGEHS  SNIIIEGPNY  QADKRYRVD  VRSASVHVG
6165  EPLYVDTANT  AIDCVFGEHS  SNIIIEGPNY  QADKRYRVD  VRSASVHVG
6162  EPLYVDTANT  AIDCVFGEHS  SNIIIEGPNY  QADKRYRVD  VRSASVHVG
Consistency 111111111  111111111  111111111  111111111  111111111
    
```

```

c2      610     620     630     640     650
4412  KFNPMQYATA  YNTKLFHWGQ  K-AVNSLNTY  GEGGVRSVDF  MTGLGCTIER
5938  KFNPMQYATA  YNTKLFHWGQ  K-AVNSLNTY  GEGGVRSVDF  MTGLGCTIER
b1L67 KYNPQMFNL  YNTRYQHWGI  KDEPQNSQY  GPCVPYENDP  MTGLGCLLRI
4410  KYNPQMFNL  YNTRYQHWGI  KDEPQNSQY  GPCVPYENDP  MTGLGCLLRI
6202  KYNPQMFNL  YNTRYQHWGI  KDEPQNSQY  GPCVPYENDP  MTGLGCLLRI
6165  KYNPQMFNL  YNTRYQHWGI  KDEPQNSQY  GPCVPYENDP  MTGLGCLLRI
6162  KYNPQMFNL  YNTRYQHWGI  KDEPQNSQY  GPCVPYENDP  MTGLGCLLRI
Consistency 811118766  111111111  111111111  111111111  111111111
    
```

```

c2      160     170     180     190     200
4412  KNELVATYQV  RPNQVLDVKE  IYFLPSTFTE  EKFGLAFEVA  QTSDFVQFEV
5938  KNELVATYQV  RPNQVLDVKE  IYFLPSTFTE  EKFGLAFEVA  QTSDFVQFEV
b1L67 SVAGVGTYYV  EPMEYVFVSE  LVTLQKTEIA  ENGLGSVELD  SVGQEEIGGL
4410  SVAGVGTYYV  EPMEYVFVSE  LVTLQKTEIA  ENGLGSVELD  SVGQEEIGGL
6202  SVAGVGTYYV  EPMEYVFVSE  LVTLQKTEIA  ENGLGSVELD  SVGQEEIGGL
6165  SVAGVGTYYV  EPMEYVFVSE  LVTLQKTEIA  ENGLGSVELD  SVGQEEIGGL
6162  SVAGVGTYYV  EPMEYVFVSE  LVTLQKTEIA  ENGLGSVELD  SVGQEEIGGL
Consistency 645418115  714815597  861155116  7771856175  7176551757
    
```

```

c2      410     420     430     440     450
4412  VNRGSYNAEV  NFDVVAEER  ASYNIENCRV  SEKTSYSSNN  EHTGSVSFPT
5938  VNRGSYNAEV  NFDVVAEER  ASYNIENCRV  SEKTSYSSNN  EHTGSVSFPT
b1L67 YSLGYSYVNE  DSGKEVEVNR  SRVGTTPPV  FGEPSPYSGN  DMNTTGNLPL
4410  YSLGYSYVNE  DSGKEVEVNR  SRVGTTPPV  FGEPSPYSGN  DMNTTGNLPL
6202  YSLGYSYVNE  DSGKEVEVNR  SRVGTTPPV  FGEPSPYSGN  DMNTTGNLPL
6165  YSLGYSYVNE  DSGKEVEVNR  SRVGTTPPV  FGEPSPYSGN  DMNTTGNLPL
6162  YSLGYSYVNE  DSGKEVEVNR  SRVGTTPPV  FGEPSPYSGN  DMNTTGNLPL
Consistency 781187664  7541754511  5667955579  5575811711  8165747716
    
```

```

c2      660     670     680     690     700
4412  YK
5938  YK
b1L67 YK
4410  YK
6202  YK
6165  YK
6162  YK
Consistency 7
    
```

```

c2      210     220     230     240     250
4412  VLPKIEQGGE  VTFPFVEDRD  FNGYRKNNTD  DGTPTPTGTY  EGTAPQSTDY
5938  VLPKIEQGGE  VTFPFVEDRD  FNGYRKNNTD  DGTPTPTGTY  EGTAPQSTDY
b1L67 FFPKIEMD-K  ITTPYVTEDE  YNYFYSQDQA  DSKPVTYGVY  DS---DSNDF
4410  FFPKIEMD-K  ITTPYVTEDE  YNYFYSQDQA  DSKPVTYGVY  DS---DSNDF
6202  FFPKIEMD-K  ITTPYVTEDE  YNYFYSQDQA  DSKPVTYGVY  DS---DSNDF
6165  FFPKIEMD-K  ITTPYVTEDE  YNYFYSQDQA  DSKPVTYGVY  DS---DSNDF
6162  FFPKIEMD-K  ITTPYVTEDE  YNYFYSQDQA  DSKPVTYGVY  DS---DSNDF
Consistency 871111117  911816677  817775765  1751581155  8511111118
    
```

```

c2      460     470     480     490     500
4412  GVLLARVYKPK  LNEIDT--KK  LKGVSSAISI  -NAT-GVLR  ERSTEDNRE
5938  GVLLARVYKPK  LNEIDT--KK  LKGVSSAISI  -NAT-GVLR  ERSTEDNRE
b1L67 GLIMRPNRVR  MVDTEFNLKA  IKGISIGHNV  SLFQ-KYLAT  DHMSEDNFRG
4410  GLIMRPNRVR  MVDTEFNLKA  IKGISIGHNV  SLFQ-KYLAT  DHMSEDNFRG
6202  GLIMRPNRVR  MVDTEFNLKA  IKGISIGHNV  SLFQ-KYLAT  DHMSEDNFRG
6165  GLIMRPNRVR  MVDTEFNLKA  IKGISIGHNV  SLFQ-KYLAT  DHMSEDNFRG
6162  GLIMRPNRVR  MVDTEFNLKA  IKGISIGHNV  SLFQ-KYLAT  DHMSEDNFRG
Consistency 898617858  848181365  8118165458  4458154161  8655111115
    
```

|       | c2 | D4412 | M5938 | b1L67 | D4410 | M6162 | M6165 | M6202 |
|-------|----|-------|-------|-------|-------|-------|-------|-------|
| c2    | 90 | 94    | 94    | 42    | 42    | 41    | 41    | 41    |
| D4412 | 90 | 91    | 42    | 41    | 40    | 41    | 41    | 41    |
| M5938 | 94 | 91    | 41    | 41    | 41    | 41    | 41    | 40    |
| b1L67 | 42 | 42    | 41    | 94    | 89    | 91    | 93    |       |
| D4410 | 42 | 41    | 41    | 94    | 89    | 92    | 93    |       |
| M6162 | 41 | 40    | 41    | 89    | 89    | 89    | 89    |       |
| M6165 | 41 | 41    | 41    | 91    | 92    | 89    | 92    |       |
| M6202 | 41 | 40    | 40    | 93    | 89    | 92    | 92    |       |

# gp14 secondary structure prediction

```
.....10.....20.....30.....40.....50
c2  MTFKAYCWN  SNTGRDFTTK  KPNWNIVQRC  SLKSEITIQY  LQQHIYLLDG
4412MTIFKAYCWN  SNTGRDFTTK  KPNWNIVQRC  SLKSIKTIEL  LPQHIYLLDG
5938MTIFKAYCWN  PNTGRDFTTK  KPNWNIVQRC  SLKSIETIQF  LPQHIYLLDG
```

```
.....60.....70.....80.....90.....100
c2  TTIVTSKRW  QRKKCPDDWN  RPFYSVIT  KPQENKIS  IAFCTDYERK
4412TTIVTSKRW  QRKKCPDDWN  RPFYSVIT  KPQENKIS  IAFCTDYERK
5938TTIVTSKRW  QRKKCPDDWN  RPFYSVIT  KPQENKIS  IAFCTDYERK
```

```
.....110.....120.....130.....140.....150
c2  QPSPLYPNFV  TPNLITQKY  LSLTYLNS  NVLVRLLK  LYTKNLVA
4412QPSPLYPNFV  TPNLITQKY  LSLTYLNS  NVLVRLLK  LYTKNLVA
5938QPSPLYPNFV  TPNLITQKY  LSLTYLNS  NVLVRLLK  LYTKNLVA
```

```
.....160.....170.....180.....190.....200
c2  TYQVRPNQYL  DVKTYTLP  TTVKFGIA  FVAQTSDFV  QFVYLPKTE
4412TYQVRPNQYL  DVKTYTLP  TTVKFGIA  FVAQTSDFV  QFVYLPKTE
5938TYQVRPNQYL  DVKTYTLP  TTVKFGIA  FVAQTSDFV  QFVYLPKTE
```

```
.....210.....220.....230.....240.....250
c2  QGGEVTPFVE  DRDEFNGYRK  TNTDDTPPF  TTYEGTAPQ  STDYKVVYWA
4412QGGEVTPFVE  DRDEFNGYRK  TNTDDTPPF  TTYEGTAPQ  STDYKVVYWA
5938QGGEVTPFVE  DRDEFNGYRK  TNTDDTPPF  TTYEGTAPQ  STDYKVVYWA
```

```
.....260.....270.....280.....290.....300
c2  GSKTDKLFY  LERGITCKQE  AVWCYCRPLN  QRVLIGTSD  TYDTEAGRIL
4412GSKTDKLFY  LERGITCKQE  AVWCYCRPLN  QRVLIGTSD  TYDTEAGRIL
5938GSKTDKLFY  LERGITCKQE  AVWCYCRPLN  QRVLIGTSD  TYDTEAGRIL
```

```
.....310.....320.....330.....340.....350
c2  KFVNLNKG  IFLDTLVNVI  PEFITKRQT  FSDTKAWVD  NQEPVYVDA
4412KFVNLNKG  IFLDTLVNVI  PEFITKRQT  FSDTKAWVD  NQEPVYVDA
5938KFVNLNKG  IFLDTLVNVI  PEFITKRQT  FSDTKAWVD  NQEPVYVDA
```

```
.....360.....370.....380.....390.....400
c2  NTAQDVC  EHSNNITEN  FN  YQADKRYRV  DVFRSARVN  KYNM  SYNA
4412NTAQDVC  EHSNNITEN  FN  YQADKRYRV  DVFRSARVN  KYNM  SYNA
5938NTAQDVC  EHSNNITEN  FN  YQADKRYRV  DVFRSARVN  KYNM  SYNA
```

```
.....410.....420.....430.....440.....450
c2  EWNFDSYAE  MRASYNENC  RVS  EKTSSYS  MNEWT  SVSF  PT  VVVLAPYK
4412EWNFDSYAE  MRASYNENC  RVS  EKTSSYS  MNEWT  SVSF  PT  VVVLAPYK
5938EWNFDSYAE  MRASYNENC  RVS  EKTSSYS  MNEWT  SVSF  PT  VVVLAPYK
```

```
.....460.....470.....480.....490.....500
c2  PKLNETD  TK  LK  GVSATS  I  WAK  NLRT  ER  TV  DWFR  VE  NSRTRPVPTQ
4412PKLNETD  TK  LK  GVSATS  I  WAK  NLRT  ER  TV  DWFR  VE  NSRTRPVPTQ
5938PKLNETD  TK  LK  GVSATS  I  WAK  NLRT  ER  TV  DWFR  VE  NSRTRPVPTQ
```

```
.....510.....520.....530.....540.....550
c2  LFANYNTKK  AWLFQQSSNG  TWSKSRFT  IP  S  ATAFARA  W  I  PKN  G  EL
4412LFANYNTKK  AWLFQQSSNG  TWSKSRFT  IP  S  ATAFARA  W  I  PKN  G  EL
5938LFANYNTKK  AWLFQQSSNG  TWSKSRFT  IP  S  ATAFARA  W  I  PKN  G  EL
```

```
.....560.....570.....580.....590.....600
c2  K  NV  M  TDKN  YADFPANARP  TL  VEE  LFP  V  KYN  VKFN  PQMYATAYNT
4412K  NV  M  TDKN  YADFPANARP  TL  VEE  LFP  V  KYN  VKFN  PQMYATAYNT
5938K  NV  M  TDKN  YADFPANARP  TL  VEE  LFP  V  KYN  VKFN  PQMYATAYNT
```

```
.....610.....620.....630.....
c2  KLFWN  QKAN  VSNLTY  E  C  E  VRSVDFMT  L  C  T  ER  VYK
4412KLFWN  QKAN  VSNLTY  E  C  E  VRSVDFMT  L  C  T  ER  VYK
5938KLFWN  QKAN  VSNLTY  E  C  E  VRSVDFMT  L  C  T  ER  VYK
```

# gp34 secondary structure prediction

```
.....10.....20.....30.....40.....50
b1L67LNKAYTNEK  TGLDFCKELP  QNWLTRSNL  RFLKGDTSED  PDKFDVGYH
4410LNKAYTNEK  TGLDFCKELP  QNWLTRSNL  RFLKGDTSED  PDKFDVGYH
6202LNKAYTNEK  TGLDFCKELP  QNWLTRSNL  RFLKGDTSED  PDKFDVGYH
6165LNKAYTNEK  TGLDFCKELP  QNWLTRSNL  RFLKGDTSED  PDKFDVGYH
6162LNKAYTNEK  TGLDFCKELP  QNWLTRSNL  RFLKGDTSED  PDKFDVGYH
```

```
.....60.....70.....80.....90.....100
b1L67KLNALSEVDR  TSQFPSDHR  PYSLGIRYN  PKNASGTGW  NYNTHNERLP
4410KLNALSEVDR  TSQFPSDHR  PYSLGIRYN  PKNASGTGW  NYNTHNERLP
6202KLNALSEVDR  TSQFPSDHR  PYSLGIRYN  PKNASGTGW  NYNTHNERLP
6165KLNALSEVDR  TSQFPSDHR  PYSLGIRYN  PKNASGTGW  NYNTHNERLP
6162KLNALSEVDR  TSQFPSDHR  PYSLGIRYN  PKNASGTGW  NYNTHNERLP
```

```
.....110.....120.....130.....140.....150
b1L67VKPNLTQGKK  MGVSMRLTNF  GRKPLDFHLK  LLYGNSVAV  GTYVPEHQY
4410VKPNLTQGKK  MGVSMRLTNF  GRKPLDFHLK  LLYGNSVAV  GTYVPEHQY
6202VKPNLTQGKK  MGVSMRLTNF  GRKPLDFHLK  LLYGNSVAV  GTYVPEHQY
6165VKPNLTQGKK  MGVSMRLTNF  GRKPLDFHLK  LLYGNSVAV  GTYVPEHQY
6162VKPNLTQGKK  MGVSMRLTNF  GRKPLDFHLK  LLYGNSVAV  GTYVPEHQY
```

```
.....160.....170.....180.....190.....200
b1L67VFSVELVTLQ  NLETAELG  RVELDSTGQE  EQIGLFPKI  EMDKVTPTVYI
4410VFSVELVTLQ  NLETAELG  RVELDSTGQE  EQIGLFPKI  EMDKVTPTVYI
6202VFSVELVTLQ  NLETAELG  RVELDSTGQE  EQIGLFPKI  EMDKVTPTVYI
6165VFSVELVTLQ  NLETAELG  RVELDSTGQE  EQIGLFPKI  EMDKVTPTVYI
6162VFSVELVTLQ  NLETAELG  RVELDSTGQE  EQIGLFPKI  EMDKVTPTVYI
```

```
.....210.....220.....230.....240.....250
b1L67TEEVNYRFS  QMDADSRPVY  TGYSDSDSD  FKDYVGGQL  NDENYELRGG
4410TEEVNYRFS  QMDADSRPVY  TGYSDSDSD  FKDYVGGQL  NDENYELRGG
6202TEEVNYRFS  QMDADSRPVY  TGYSDSDSD  FKDYVGGQL  NDENYELRGG
6165TEEVNYRFS  QMDADSRPVY  TGYSDSDSD  FKDYVGGQL  NDENYELRGG
6162TEEVNYRFS  QMDADSRPVY  TGYSDSDSD  FKDYVGGQL  NDENYELRGG
```

```
.....260.....270.....280.....290.....300
b1L67DTKQNAVVCY  CRPLNQRVLI  GDSDSYTN  SGRTVNFHVL  NGSKSVFDMT
4410DTKQNAVVCY  CRPLNQRVLI  GDSDSYTN  SGRTVNFHVL  NGSKSVFDMT
6202DTKQNAVVCY  CRPLNQRVLI  GDSDSYTN  SGRTVNFHVL  NGSKSVFDMT
6165DTKQNAVVCY  CRPLNQRVLI  GDSDSYTN  SGRTVNFHVL  NGSKSVFDMT
6162DTKQNAVVCY  CRPLNQRVLI  GDSDSYTN  SGRTVNFHVL  NGSKSVFDMT
```

```
.....310.....320.....330.....340.....350
b1L67GNTLYPEQFQ  DARQAFDSVG  NDWATIIEP  YVVDQNTAID  PVA  GERANVV
4410GNTLYPEQFQ  DARQAFDSVG  NDWATIIEP  YVVDQNTAID  PVA  GERANVV
6202GNTLYPEQFQ  DARQAFDSVG  NDWATIIEP  YVVDQNTAID  PVA  GERANVV
6165GNTLYPEQFQ  DARQAFDSVG  NDWATIIEP  YVVDQNTAID  PVA  GERANVV
6162GNTLYPEQFQ  DARQAFDSVG  NDWATIIEP  YVVDQNTAID  PVA  GERANVV
```

```
.....360.....370.....380.....390.....400
b1L67EGYHVQQA  S  QGYR  V  DEVR  S  AILN  V  GYS  L  GS  Y  V  V  N  D  S  G  KE  V  G  V  M  R  S  R  V
4410EGYHVQQA  S  QGYR  V  DEVR  S  AILN  V  GYS  L  GS  Y  V  V  N  D  S  G  KE  V  G  V  M  R  S  R  V
6202EGYHVQQA  S  QGYR  V  DEVR  S  AILN  V  GYS  L  GS  Y  V  V  N  D  S  G  KE  V  G  V  M  R  S  R  V
6165EGYHVQQA  S  QGYR  V  DEVR  S  AILN  V  GYS  L  GS  Y  V  V  N  D  S  G  KE  V  G  V  M  R  S  R  V
6162EGYHVQQA  S  QGYR  V  DEVR  S  AILN  V  GYS  L  GS  Y  V  V  N  D  S  G  KE  V  G  V  M  R  S  R  V
```

```
.....410.....420.....430.....440.....450
b1L67GITPPV  V  FGE  PSYSG  N  D  W  M  T  Y  G  L  P  N  G  I  N  R  P  H  R  V  R  M  V  D  T  E  N  L  K  A  K  G
4410GITPPV  V  FGE  PSYSG  N  D  W  M  T  Y  G  L  P  N  G  I  N  R  P  H  R  V  R  M  V  D  T  E  N  L  K  A  K  G
6202GITPPV  V  FGE  PSYSG  N  D  W  M  T  Y  G  L  P  N  G  I  N  R  P  H  R  V  R  M  V  D  T  E  N  L  K  A  K  G
6165GITPPV  V  FGE  PSYSG  N  D  W  M  T  Y  G  L  P  N  G  I  N  R  P  H  R  V  R  M  V  D  T  E  N  L  K  A  K  G
6162GITPPV  V  FGE  PSYSG  N  D  W  M  T  Y  G  L  P  N  G  I  N  R  P  H  R  V  R  M  V  D  T  E  N  L  K  A  K  G
```

```
.....460.....470.....480.....490.....500
b1L67ISIGNVS  L  F  Q  KY  I  A  T  D  H  M  S  ED  W  F  R  G  Y  D  N  K  R  T  K  A  I  P  D  R  V  L  F  I  N  D  K  Q  K  R  A  W
4410ISIGNVS  L  F  Q  KY  I  A  T  D  H  M  S  ED  W  F  R  G  Y  D  N  K  R  T  K  A  I  P  D  R  V  L  F  I  N  D  K  Q  K  R  A  W
6202ISIGNVS  L  F  Q  KY  I  A  T  D  H  M  S  ED  W  F  R  G  Y  D  N  K  R  T  K  A  I  P  D  R  V  L  F  I  N  D  K  Q  K  R  A  W
6165ISIGNVS  L  F  Q  KY  I  A  T  D  H  M  S  ED  W  F  R  G  Y  D  N  K  R  T  K  A  I  P  D  R  V  L  F  I  N  D  K  Q  K  R  A  W
6162ISIGNVS  L  F  Q  KY  I  A  T  D  H  M  S  ED  W  F  R  G  Y  D  N  K  R  T  K  A  I  P  D  R  V  L  F  I  N  D  K  Q  K  R  A  W
```

```
.....510.....520.....530.....540.....550
b1L67LYKNPTKRA  W  E  R  S  V  E  Y  I  P  A  S  N  T  A  L  L  K  Y  W  T  I  I  P  K  D  G  A  M  N  G  H  I  V  F  T  D  K  T  N
4410LYKNPTKRA  W  E  R  S  V  E  Y  I  P  A  S  N  T  A  L  L  K  Y  W  T  I  I  P  K  D  G  A  M  N  G  H  I  V  F  T  D  K  T  N
6202LYKNPTKRA  W  E  R  S  V  E  Y  I  P  A  S  N  T  A  L  L  K  Y  W  T  I  I  P  K  D  G  A  M  N  G  H  I  V  F  T  D  K  T  N
6165LYKNPTKRA  W  E  R  S  V  E  Y  I  P  A  S  N  T  A  L  L  K  Y  W  T  I  I  P  K  D  G  A  M  N  G  H  I  V  F  T  D  K  T  N
6162LYKNPTKRA  W  E  R  S  V  E  Y  I  P  A  S  N  T  A  L  L  K  Y  W  T  I  I  P  K  D  G  A  M  N  G  H  I  V  F  T  D  K  T  N
```

```
.....560.....570.....580.....590.....600
b1L67AENLQNIRPN  W  L  D  Y  D  E  F  T  P  Q  V  D  E  V  K  Y  N  P  Q  M  F  T  N  L  Y  N  T  R  Y  Q  W  G  I  K  D  N
4410AENLQNIRPN  W  L  D  Y  D  E  F  T  P  Q  V  D  E  V  K  Y  N  P  Q  M  F  T  N  L  Y  N  T  R  Y  Q  W  G  I  K  D  N
6202AENLQNIRPN  W  L  D  Y  D  E  F  T  P  Q  V  D  E  V  K  Y  N  P  Q  M  F  T  N  L  Y  N  T  R  Y  Q  W  G  I  K  D  N
6165AENLQNIRPN  W  L  D  Y  D  E  F  T  P  Q  V  D  E  V  K  Y  N  P  Q  M  F  T  N  L  Y  N  T  R  Y  Q  W  G  I  K  D  N
6162AENLQNIRPN  W  L  D  Y  D  E  F  T  P  Q  V  D  E  V  K  Y  N  P  Q  M  F  T  N  L  Y  N  T  R  Y  Q  W  G  I  K  D  N
```

```
.....610.....620.....
b1L67PQNQSYGPCV  P  Y  E  M  D  F  T  G  L  C  K  L  E  R  I  Y  E
4410PQNQSYGPCV  P  Y  E  M  D  F  T  G  L  C  K  L  E  R  I  Y  E
6202PQNQSYGPCV  P  Y  E  M  D  F  T  G  L  C  K  L  E  R  I  Y  E
6165PQNQSYGPCV  P  Y  E  M  D  F  T  G  L  C  K  L  E  R  I  Y  E
6162PQNQSYGPCV  P  Y  E  M  D  F  T  G  L  C  K  L  E  R  I  Y  E
```

# gpl15 – gp35 amino acid alignment / % identity

Unconserved 1 2 3 4 5 6 7 8 9 10 Conserved

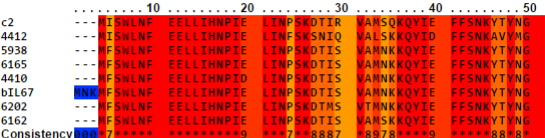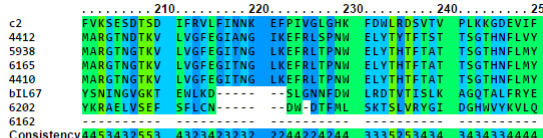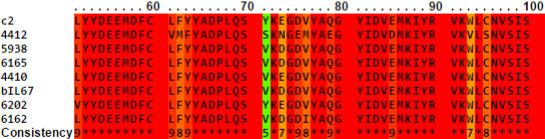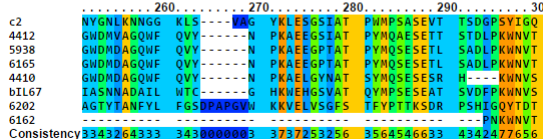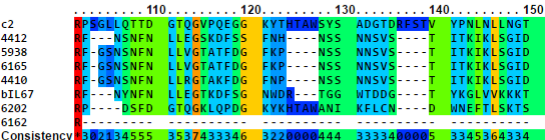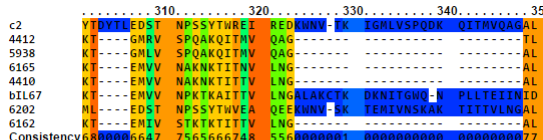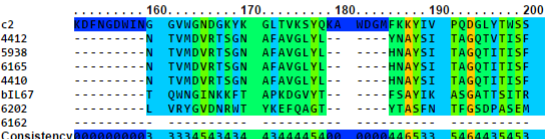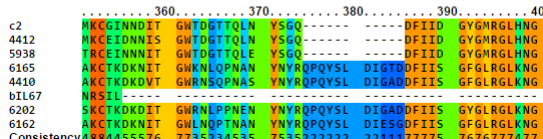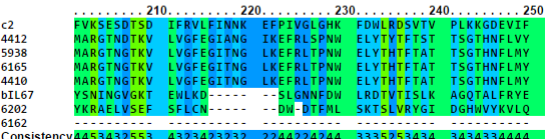

gpl15 / gp35 N-terminal

|       | c2 | D4412 | M5938 | blL67 | D4410 | M6162 | M6165 | M6202 |
|-------|----|-------|-------|-------|-------|-------|-------|-------|
| c2    |    | 79    | 94    | 94    | 94    | 94    | 94    | 93    |
| D4412 | 79 |       | 78    | 78    | 77    | 79    | 78    | 75    |
| M5938 | 94 | 78    |       | 100   | 98    | 98    | 100   | 95    |
| blL67 | 94 | 78    | 100   |       | 98    | 98    | 100   | 95    |
| D4410 | 94 | 77    | 98    | 98    |       | 96    | 98    | 95    |
| M6162 | 94 | 79    | 98    | 98    | 96    |       | 98    | 93    |
| M6165 | 94 | 78    | 100   | 100   | 98    | 98    |       | 95    |
| M6202 | 93 | 75    | 95    | 95    | 95    | 93    | 95    |       |

gpl15 / gp35 Middle

|       | c2 | D4412 | M5938 | blL67 | D4410 | M6162 | M6165 | M6202 |
|-------|----|-------|-------|-------|-------|-------|-------|-------|
| c2    |    | 22    | 25    | 0     | 24    | -     | 25    | 0     |
| D4412 | 22 |       | 85    | 28    | 84    | -     | 85    | 0     |
| M5938 | 20 | 85    |       | 94    | -     | -     | 100   | 0     |
| blL67 | 45 | 28    | 25    |       | 24    | -     | 25    | 0     |
| D4410 | 19 | 84    | 94    | 24    |       | -     | 94    | 0     |
| M6162 | -  | -     | -     | -     | -     | -     | -     | -     |
| M6165 | -  | 85    | 100   | 25    | 94    | -     | -     | 0     |
| M6202 | 8  | 0     | 0     | 0     | 0     | -     | 0     |       |

gpl15 / gp35 C-terminal

|       | c2 | D4412 | M5938 | blL67 | D4410 | M6162 | M6165 | M6202 |
|-------|----|-------|-------|-------|-------|-------|-------|-------|
| c2    |    | 88    | 89    | 45    | 42    | 47    | 45    | 46    |
| D4412 | 88 |       | 89    | 46    | 41    | 49    | 46    | 46    |
| M5938 | 89 | 89    |       | 45    | 41    | 47    | 45    | 45    |
| blL67 | 45 | 46    | 45    |       | 86    | 82    | 86    | 84    |
| D4410 | 42 | 41    | 41    | 86    |       | 80    | 90    | 87    |
| M6162 | 47 | 49    | 47    | 82    | 80    |       | 84    | 82    |
| M6165 | 45 | 46    | 45    | 86    | 90    | 84    |       | 84    |
| M6202 | 46 | 46    | 45    | 84    | 87    | 82    | 84    |       |

# gp15 secondary structure prediction

```

.....10.....20.....30.....40.....50
c2 M S W L N F E E L L I H N P E L I N P S K D T R V A M S Q K Q Y E F F S N K Y T Y N G L Y Y
4412 M I S W L N F E E L L I H N P E L I N F S K S N I Q V A L S K K Q Y I D F F S N K A V Y N G L Y Y
5938 M F S W L N F E E L L I H N P E L I N P S K D T E S V A M N K K Q Y E F F S N K Y T Y N G L Y Y

.....60.....70.....80.....90.....100
c2 D E E M D F C L F Y Y A D P L Q S Y K E E D V Y A Q G Y I D V E M K I Y R V K W L C N V S I S R P S
4412 D E E M D F C V M F Y A D P L Q S S K N G E M Y A E G Y I D V D M K I Y R V K W L S N V S I S R
5938 D E E M D F C L F Y Y A D P L Q S V K D G D Y A Q G Y I D V E M K I Y R V K W L C N V S I S R

.....110.....120.....130.....140.....150
c2 L L Q T T D E T Q V P Q E G K Y T T A N S Y S A D G T D R F S T V Y P N L N L L N T K D F
4412 -----F-----N S N F N L L E G S Y F
5938 -----F G S N S N F N L L V G T A F

.....160.....170.....180.....190.....200
c2 N D W N S E V W E N D K Y K L T V K S Y Q K A M D S M F K K Y V P Q D L Y T W S S F V K
4412 S S F N H N S S N N S V S T I T K I K U S G I D N T V M D V R T S G N A F A V G L Y L N A Y S I
5938 D G F K P N S S N N S V S T I T K I K L S G I D N T V M D V R T S G N A F A V G L Y L H N A Y S I

```

```

.....210.....220.....230.....240.....250
c2 S E S D T S D F R V L F I N N K E F P E V L G H K F D W L R D S V T V P L K K D E V I F N Y E
4412 A G Q T V T I S F M A R G T N D T K V L V G F E G I A N G I R E F R L S P N W E L Y T Y T T
5938 A G Q T I T I S F M A R G T N G T K V L V G E G I T N G L K E F R L T P N W E L Y T Y T T

.....260.....270.....280.....290.....300
c2 N L K N N G G K L S V A G Y K L E S S A T P M P S A S E V T T S D P S Y I Q Q Y T D Y T L E
4412 S T T S G T H N F L V Y G W D M V A G Q -----H F Q Y Y N P K A E E G S I A T P Y M Q
5938 A T T S G T H N F L M Y G M D M D A G Q -----H F Q Y Y N P K A E E G P T A T P Y M Q

.....310.....320.....330.....340.....350
c2 D S T N P S S Y T H R E R E D K W N V T K I M L V S P Q D K Q I M V Q A E A L M K C G I N N D
4412 A E S E T T S T D L P K H N V -----K T G M R V S P G A Q L T M V Q A G T L W K G E I D N N
5938 S E S E T L S A D L P K H N V -----K T G M L V S P G A Q I T M V Q A G A L T R G E I N N

.....360.....370.....380
c2 T E W T D E T T Q L N Y S G Q D F I I D G Y M R L L N E
4412 I S G W T D G T T Q L N Y S G Q D F I I D G Y G M R G L H N G
5938 I T G W T D G T T Q L E Y S G Q D F I I D G Y G M R G L H N G

```

# gp35 secondary structure prediction

```

.....10.....20.....30.....40.....50
b1L67 M N K M F S W L N F E E L L I H N P I E L I N P S K D T I S V A M N K K Q V I E F F S N K Y T Y N G
4410 ---MFS N L N F E E L L I H N P I D L I N P S K D T I S V A M N K K Q V I E F F S N K Y T Y N G
6165 ---MFS W L N F E E L L I H N P I E L I N P S K D T I S V A M N K K Q V I E F F S N K Y T Y N G
6202 ---MFS W L N F E E L L I H N P I E L I N P S K D T I S V A M N K K Q V I E F F S N K Y T Y N G
6162 ---MFS N L N F E E L L I H N P I E L I N P S K D T I S V A M N K K Q V I E F F S N K Y T Y N G

.....60.....70.....80.....90.....100
b1L67 L Y Y D E E M D F C L F Y Y A D P L Q S V K D G D V Y A Q G Y I D V E M K I Y R V K W L C N V S I S
4410 L Y Y D E E M D F C L F Y Y A D P L Q S V K E G D V Y A Q G Y I D V E M K I Y R V K W L C N V S I S
6165 L Y Y D E E M D F C L F Y Y A D P L Q S V K D G D V Y A Q G Y I D V E M K I Y R V K W L C N V S I S
6202 V Y Y D E E M D F C L F Y Y A D P L Q S Y K E G D V Y A Q G Y I D V E M K I Y R V K W L C N V S I S
6162 L Y Y D E E M D F C L F Y Y A D P L Q S V K D G D V Y A Q G Y I D V E M K I Y R V K W L C N V S I S

.....110.....120.....130.....140.....150
b1L67 R F F N Y N F N L L E G T K D F S G N W D ---R T G G W T D D G T Y K G L V V K K K T I Q W N G
4410 R F G S N S N F N L L R G T A K D F G F N ---P N S S N N S V S T I T K I K L S G I D N T V M D
6165 R F G S N S N F N L L V G T A T F D G F K ---P N S S N N S V S T I T K I K L S G I D N T V M D
6202 R ---P D S F D G T Q G K L Q P D G K Y K H T A W A N I K F L C N D W N E E T L S K T S L V R Y G
6162 -----R P N K W N V I -----

.....160.....170.....180.....190.....200
b1L67 I N K K F T A P K D G M Y T F S A Y I K A S G A T T S T R Y S N I N G V G K T E W -----
4410 V R T S G N A F A V G L Y L H N A Y S I T A G Q T I T I S F M A R G T N G T K V L V G F E G -----
6165 V R T S G N A F A V G L Y L H N A Y S I T A G Q T I T I S F M A R G T N G T K V L V G F E G -----
6202 V O N R W T Y K E F Q R G T Y T A S E N T F G S D P A S E M Y K R A E L V S E F S F L C N D W D T F
6162

```

```

.....210.....220.....230.....240.....250
b1L67 ---L K D S L G N N F D L R D T V T I S L K A G Q T A L F R Y E I A S N N A D A I L W T C G
4410 I T N G L K E F R L T P N W E L Y T H T F A T T S G T H N F L M Y G W D M D - A G Q M F Q V Y N
6165 I T N G L K E F R L T P N W E L Y T H T F A T T S G T H N F L M Y G W D M D - A G Q M F Q V Y N
6202 M S K T S L V R Y G I D G H V Y V K W L Q A G T Y T A N F Y L F G S D P A P G - V W K K V E L V S
6162 -----K T E M I V S T K T K ---T I T V -----

.....260.....270.....280.....290.....300
b1L67 H K W E H G S V A T Q Y M P S -----E S E A T S V D F P K N N Y S K T -----E
4410 P K A E L G Y N A T S Y M Q S -----E S E S H ---K N N V S K -----T E
6165 P K A E E G P T A T P Y M Q S -----E S E T L S A D L P K N N Y S K -----T E
6202 G F S T F Y P T T K S D R P S H I Q Y T D T M L E D S T N P S S Y T W V E A Q E E K W N V S K T E
6162 -----

.....310.....320.....330.....340.....350
b1L67 M V V N P K T K A E T T V L N G A L A K C T K D K N I T G W Q N - P L I -----
4410 M V V N A K N K T I T T V L N G A L A K C T K D K D V T G W R N S Q P N A S Y N Y R Q P Q Y S L D I
6165 M V V N A K N K T I T N V L N G A L A K C T K D K N I T G W K N L Q P N A N Y N Y R Q P Q Y S L D I
6202 M V V N S K A K T I T T V L N G A L S K C T K D K D I T G W R N L P P N E N Y N Y R Q P Q Y S L D I
6162 -----L N G A L A K C T K D K N I T G W L N Q P T N A N Y N Y R Q P Q Y S L D I

.....360
b1L67 ---T E I I N I D N R S I L ---
4410 G A D D F I I S G F G L R G L K N G
6165 G T D D F I I S G F G L R G L K N G
6202 G A D D F I I S G Y G L R G L K N G
6162 E S G D F I I S G F G L R G L K N G

```

# gpl16 – gp36 amino acid alignment / % identity

Unconserved 12345678910 Conserved

```

c2      ..... 10 ..... 20 ..... 30 ..... 40 ..... 50
4412   NDSTINGKTV HINNPLDLIG LGRREIEFNI PKTDVWEHFK ETMQVPTMKR
5938   NDSTINGKTV HINNPLDLIG LGRREIEFNI HKADVWEHFK ETMQVPTMKR
6162   NDSYLNGRKV DVLNPLDLIG VGRHKLEIQV DKKNYWNNFK EQIIPITPPN
6165   NDSYLNGRKV DVLNPLDLIG VGRHKLEIQV DKKNYWNNFK EQIIPITPPN
6202   NDSYLNGRKV DVLNPLDLIG VGRHKLEIQV DKKNYWNNFK EQIIPITPPN
bIL67  NDSYLNGRKV DVLNPLDLIG VGRHKLEIQV DKKNYWNNFK EQIIPITPPN
4410   NDSTINGKTV HINNPLDLIG LGRREIEFNI PKTDVWEHFK ETMQVPTMKR
Consistency 115811866 695111111 7116781769 4167146194 1665911566

```

```

c2      ..... 260 ..... 270 ..... 280 ..... 290 ..... 300
4412   EPLGTDPRLLH DEEYVDHFFV EGKQGHREVS ANFGFYVSEED YAFCSAFKVN
5938   ELLGTDPRLLH DEEYVDHFFV EGKQGHREVS ANFGFYVSEED YAFCSAFKVN
6162   G--PKPPQLS EADRKYIYQV QMDKGRREIV PNFGFYVSEED YDFCCAYKVN
6165   G--PKPPQLS EADRKYIYQV QMDKGRREIV PNFGFYVSEED YDFCCAYKVN
6202   G--PKPPQLS EADRKYIYQV QMDKGRREIV PNFGFYVSEED YDFCCAYKVN
bIL67  G--PKPPQLS EADRKYIYQV QMDKGRREIV PNFGFYVSEED YDFCCAYKVN
4410   G--PKPPQLS EADRKYIYQV QMDKGRREIV PNFGFYVSEED YDFCCAYKVN
Consistency 5115661716 688516715 8557151195 6111111118 85111618111

```

```

c2      ..... 60 ..... 70 ..... 80 ..... 90 ..... 100
4412   GRVYNLIRGG HVEVDFENQG NRKLRTEYF FTSKGE--YV QTFGASGDI
5938   GRVYNLIRGG HVEVDFENQG NRKLRTEYF FTSKGE--YV QTFGASGDI
6162   NRVSNLRFRGG EIL--PSEVY NDNYKTFNAF YVYGG---DQ STIERKNDLY
6165   NRVSNLRFRGG EIL--PSEVY NDNYKTFNAF YVYGG---DQ STIERKNDLY
6202   NRVSNLRFRGG EIL--PSEVY NDNYKTFNAF YVYGG---DQ STIERKNDLY
bIL67  NRVSNLRFRGG EIL--PSEVY NDNYKTFNAF YVYGG---DQ STIERKNDLY
4410   NRVSNLRFRGG EIL--PSEVY NDNYKTFNAF YVYGG---DQ STIERKNDLY
Consistency 6166117811 597115655 614158669 544180005 6865575188

```

```

c2      ..... 310 ..... 320 ..... 330 ..... 340 ..... 350
4412   IHKGFETRFG NPVTQFEFCK AEVENFAQIV NPRTIKYQDI NQIPDNVNNH
5938   IHKGFETRFG NPVTQFEFCK AEVENFAQIV NPRTIKYQDI NQIPDNVNNH
6162   IHKGFETVDF NPVEQSYTIR CEVENFAQIL NPVREYV--- IKVPSCTFD
6165   IHKGFETVDF NPVEQSYTIS CEVENFAQIL NPVREYV--- IKVPSCTFD
6202   IHKGFETVDF NPVEQSYTIR CEVENFAQIL NPVREYV--- IKVPSCTFD
bIL67  IHKGFETVDF NPVEQSYTIR CEVENFAQIL NPVREYV--- IKVPSCTFD
4410   IHKGFETVDF NPVEQSYTIR CEVENFAQIL NPVREYV--- IKVPSCTFD
Consistency 711111464 1486178667 6111111117 117471111 4791766667

```

```

c2      ..... 110 ..... 120 ..... 130 ..... 140 ..... 150
4412   DYGTYESGYY AFKCPNDKNE EDYSK--YVQ LNLKPNNTY TMDQDMKRTT
5938   DYGTYESGYY AFKCPNDKNE EDYSK--YVQ LNLKPNNTY TMDQDMKRTT
6162   PQNNY----- FKFANNTGE ADIPSNQFEK EIELKPNTRY TMDFNARK--
6165   PQNTY----- FKFANATGE ADIACNQFEK EVELKPNTRY TMDFNARK--
6202   PQNTY----- FKFANNTGE ADIACNQFEK EVELKPNTRY TMDFNARK--
bIL67  PQNTY----- FKFANNTGE ADIACNQFEK EVELKPNTRY TMDFNARK--
4410   PQNTY----- FKFANATGE ADIACNQFEK EVELKPNTRY TMDFNARK--
Consistency 6658111111 115684664 614443666 544188886 1716768811

```

```

c2      ..... 360 ..... 370 ..... 380 ..... 390 ..... 400
4412   NTIIYNP--K PNGIDYLOCR AKGNHSLYK VRDQNSYVY PKRQATTFD
5938   NTIIYNP--K PNGIDYLOCR AKGNHSLYK VRDQNSYVY PKRQATTFD
6162   NSILNMPDTE RGGNYLLECK AKGLHLQVFE QPDGYSRSQ NRKVYSNNVE
6165   NSILNMPDTE RGGNYLLECK AKGLHLQVFE QPDGYSRSQ NRKVYSNNVY
6202   NSILNMPDTE RGGNYLLECK AKGLHLQVFE QPDGYSRSQ NRKVYSNNVY
bIL67  NSILNMPDTE RGGNYLLECK AKGLHLQVFE QPDGYSRSQ NRKVYSNNVY
4410   NSILNMPDTE RGGNYLLECK AKGLHLQVFE QPDGYSRSQ NRKVYSNNVY
Consistency 1718611337 5615561819 8115786787 5486718655 5885576686

```

```

c2      ..... 160 ..... 170 ..... 180 ..... 190 ..... 200
4412   SSKKGDQINF IGAGAGDNTF IDTSKPFYVN ESLHSA--G TDGVYSVNSF
5938   SSKKGDNETF MGTSGN--TI IDLTPPYVYN GESVQQRENS VDFVFRINER
6162   --EKGNMNTY FRTSGS--VL IDNTKVTVD GETGK--LG TDFYNSMK
6165   --EKGNMNTF FRTSGS--IL VDNTKVTVD GETGLK--LG NDLYKSNK
6202   --EKGNMNTY FRTSGS--SL VDDAKNVTVD GQTGLR--LG ADLYNSDK
bIL67  --EKGNMNTY FGAGGS--IL ADNTKVTVD GETGK--LG TDLAYNSMK
4410   --EKGNMNTY FGANGS--VL VDNTKVTVD GQTGLR--LG ADLYNSDK
Consistency 111188488 616587057 8147148587 177446047 5146661756

```

```

c2      ..... 410 ..... 420 .....
4412   SVPSSKR--LY GGVYVTGELQ TVEIEN
5938   SVPSSKR--LY GGVYVTGELQ TVEIEN
6162   NLNQTANWAY GGVYVTGELQ TVEIEN
6165   NLNQTANWAY GGVYVTGELQ TKVVEN
6202   NLNQTANWAY GGVYVTGELQ TYQLEN
bIL67  NLNAKMNWVF GGVYVTGELQ TYQLEN
4410   NLNEKMNWVF GGVYVTGELQ TYQVEN
Consistency 7745541368 1161111111 1178111

```

```

c2      ..... 210 ..... 220 ..... 230 ..... 240 ..... 250
4412   INSDTDLHK CTEVFTTKNP ITDLKSKTFR WRAKKGSNK VKNIMFEGS
5938   INSDTDLHK CTEVFTTKST LPAVAGASLR WRAKKDSNK VKNIMFDGS
6162   AVTDG--NEL HYISFTTAST FP--TSKTFR FRMSANSEIH VKNIQITEGE
6165   AVTDG--NEL HYISFTTAST FP--SAKTFR FRMSANSEIH VKNIQITEGE
6202   AVTDS--NEL HYISFTTAST LP--SAKTFR FRMTDNSEIH VKNIQITEGE
bIL67  AVTDG--NEL HYISFTTAST FP--TSKTFR FRMNAGSEIH VKNIQITEGE
4410   AVTDG--NQL HYISFTTAST LP--TSKTFR FRMNAGSEIH VKNIQITEGE
Consistency 647851165 5575118678 681056686 6165591766 1111775917

```

|       | c2 | D4412 | M5938 | bIL67 | D4410 | M6162 | M6165 | M6202 |
|-------|----|-------|-------|-------|-------|-------|-------|-------|
| c2    |    | 79    | 81    | 38    | 37    | 37    | 37    | 37    |
| D4412 | 79 |       | 88    | 39    | 39    | 38    | 40    | 39    |
| M5938 | 81 | 88    |       | 40    | 39    | 39    | 40    | 39    |
| bIL67 | 38 | 39    | 40    |       | 94    | 90    | 88    | 89    |
| D4410 | 37 | 40    | 40    | 94    |       | 89    | 88    | 91    |
| M6162 | 37 | 38    | 39    | 90    | 89    |       | 89    | 88    |
| M6165 | 37 | 40    | 40    | 88    | 88    | 89    |       | 90    |
| M6202 | 37 | 39    | 39    | 89    | 91    | 88    | 90    |       |

# gpl16 secondary structure prediction

```
.....10.....20.....30.....40.....50
c2 MDSTNKTV HNNPLDLG LRRREEFN PKTDYWFK TMOVPTMKR
4412MDSTINGKTV HINNPDLIG LGRREIEFNI PKSDYNEFER ETQVPTMKR
5938MDSTINGKTV HINNPDLIG LGRREIEFNI HKADYNEFER ETMOVPTMKR

.....60.....70.....80.....90.....100
c2 GYKNLKSG WVEVDFPNQGRDLWTRFYFT TSGG--TVWQ TFASDIDFD
4412GGYKNIKGG WVEVDFPNQGRDLWTEYFKRAGADEPCNT HFASSGDIFD
5938GGYKNIKGG WVEVDFPNQGRDLWTKDYFT KSGG--NVWQ TFGPSGDIFD

.....110.....120.....130.....140.....150
c2 YTYEAGYNN FKCPDKNFE DYITGNQLSE LQAQKTYTLQ WDMKRTTSS
4412GYTYESGYYS FKCPDKNFE DYSKYNQLNI LKPNITYTQ WDMKRTTSSI
5938GYTYESGYNN FKCPDTKDE DYTKYAQINF LKPNITYTQ WDMKRTTSSI

.....160.....170.....180.....190.....200
c2 KEDTQNFQA GADNTEFDT SKPFYVNSL SA--GTDG YVSWNSFDOS
4412KGDHETFGT SGN--TIIDL TKPVVYNGES YQQAENSVDG FVRWNRRTNS
5938KGDHETFGT GGS--TIIDL TKPVVYNGET YQQAENSADG FVSWNRRTNS

.....210.....220.....230.....240.....250
c2 EDTSHRCTV FTCKNPTD LSKRTLRRA KKS5SWKVKKN IMFEGSEPL
4412DNTDHHKCVF VFTTKPTLPN AGARSLRWRA KKDSSWKVKKN IMFEGSELL
5938EDTSHKCVF VFTTKSTLPN TGSLSLRWRA KKDSSWKVKKN IMFEGSELL
```

```
.....260.....270.....280.....290.....300
c2 TDFRLLDEE YYDHTFYFK QMRVVSANF FYYVSFYAF CSAFKVNIHK
4412GDFRLLDEE YYDHTFYEGR QGMREVVSANF GEYVSIFYAF CSAFKVNIHK
5938GDFRLLDEE YYDHTFYEGK QGMREVVSANF GEYVSIFYAF CSAFKVNIHK

.....310.....320.....330.....340.....350
c2 FETRGFNPV TQEFCKSEV NFAQVNPV IKYYQDKQ PDNVNNNTI
4412GFETRGFNPV TQEFCKAEV ENFAQVNPV IKYYQDNQI PDNVNNNTI
5938GFETRGFNPV TQEFCKAEV ENFAQVNPV IKYYQDKQI PDDVNNNTI

.....360.....370.....380.....390.....400
c2 YNPKPND YLQCRANKY MSLYKVRDDN YSSVYPRWQ ATFFDSVPSS
4412YNPKPND YLQCRANKN RTLYKVRDDN YSSVYPRWQ ATFFDSVPSS
5938YNPKPND YLQCRANKN MSLYKVRDDN YSSVYPRWQ ATFFDSVPSR

.....410.....420
c2 KWLYGVCYT TLQTYEIN
4412KWLYGVCYT TLQTYEIN
5938KWLYGVCYT TLQTYEIN
```

# gp36 secondary structure prediction

```
.....10.....20.....30.....40.....50
b167MDSYLNGRKV DVLNPLDLIG VGRHKLEIQV DKKNYNNMFK EQIIPTPPN
6202 MDSYLNGRKV DVLNPLDLIG VGRHKLEIQV DKKNYNNMFK EQIIPTPPN
4410 MDSYLNGRKV DVLNPLDLIG VGRHKLEIQV DKKNYNNMFK EQIIPTPPN
6165 MDSYLNGRKV DVLNPLDLIG VGRHKLEIQV DKKNYNNMFK EQIIPTPPN
6162 MDSYLNGRKV DVLNPLDLIG VGRHKLEIQV GKKNYNNMFK EQIIPTPPN

.....60.....70.....80.....90.....100
b167NGVNNLFRGG EILPSEVYND NNYKTWAFYA FGGQSTVERK SDLYPQMTYF
6202 NGVNNLFRGG EILPSEVYND NNYKTWAFYA FGGQSTIERK NDLYPQMTYF
4410 NGVNNLFRGG EILPSEVYND NNYKTWAFYA FGGQSTVERK SDLYPQMTYF
6165 NGVNNLFRGG EILPSEVYND NNYKTWAFYA FGGQSTIERK NDLYPQMTYF
6162 NGVNNLFRGG EILPSEVYND DNYKTWAFYF MGGQSTIERK NDLYPQMNYF

.....110.....120.....130.....140.....150
b167KFANATGEAD IVSNQFEREV ELKPNTRYTW QFNARKKGD RLTYFGAGGS
6202 KFANATGEAD VASNOFEREV ELKPNTRYTW QFNARKKGD RLTYFGTSGS
4410 KFANATGEAD IVSNQFEREV ELKPNTRYTW QFNARKKGD RLTYFGANGS
6165 KFANATGEAD IACNOFEREV ELKPNTRYTW QFNARKKGD RLTYFGTSGS
6162 KFANATGEAD IPSNOFEREV ELKPNTRYTW QFNARKKGD RLTYFGSTGS

.....160.....170.....180.....190.....200
b167LIDNTKDYV TDGQGIKLG TDLFYNSNK AVTDGRELHY ISFTASTFP
6202 SLVDDAKNYV VDGQIGLRLG ADLFYNSDK AVTDSRELHY ISFTASTLP
4410 VLDNTKNYV VDGQIGLRLG ADLFYNSDK AVTDGRELHY ISFTASTLP
6165 LLDNTKDYV TDGQIGLKLG NDLFYNSNK AVTDGRELHY ISFTASTFP
6162 LLDNTKDYV TDGQGIKLG TDLFYNSNK AVTDGRELHY ISFTASTFP

.....210.....220.....230.....240.....250
b167TSKTRFRMNS ANSEHHVKNI QITEGEGPKP FQLEADRYK YTYQNDKGH
6202 SAKTRFRMNT DNSEHHVKNI QITEGEGPKP FQLEADRYK YTYQNDKGH
4410 TSKTRFRMNS ANSEHHVKNI QITEGEGPKP FQLEADRYK YTYQNDKGH
6165 SAKTRFRMNS ANSEHHVKNI QITEGEGPKP FQLEADRYK YTYQNDKGH
6162 TSKTRFRMNS ANSEHHVKNI QITEGEGPKP FQLEADRYK YTYQNDKGH
```

```
.....260.....270.....280.....290.....300
b167REIYPNFGFY YSEEDFCCA YKVNHSGFV TVDFNPVEQS YTIRCEVENF
6202 REIYPNFGFY YSEEDFCCA YKVNHSGFV TVDFNPVEQS YTIRCEVENF
4410 REIYPNFGFY YSEEDFCCA YKVNHSGFV TVDFNPVEQS YTIRCEVENF
6165 REIYPNFGFY YSEEDFCCA YKVNHSGFV TVDFNPVEQS YTIRCEVENF
6162 REIYPNFGFY YSEEDFCCA YKVNHSGFV TVDFNPVEQS YTIRCEVENF

.....310.....320.....330.....340.....350
b167AQILNPVREY YIKVPSNCTF DNSILNPTT ERGGNYLLEC KAKGLHLQVF
6202 AQILNPVREY YIKVPSCTF DNSILNPTT ERGGNYLLEC KTKGLHLQVF
4410 AQILNPVREY YIKVPSNCTF DNSILNPTT ERGGNYLLEC KAKGLHLQVF
6165 AQILNPVREY YIKVPSCTF DNSILNPTT ERGGNYLLEC KAKGLHLQVF
6162 AQILNPVREY YIKVPSCTF DNSILNPTT ERGGNYLLEC KAKGLHLQVF

.....360.....370.....380.....390.....
b167EQPDGDYSRS QNRKVVYNNHY ENLNKMNHV FGGVYVTGEL QTYQLEN
6202 EQPDGDYSRS QNRKVVSNHY ENLNKMNHV YGGVYVTGEL QTYQLEN
4410 EQPDGDYSRS QNRKVVYNNHY ENLNKMNHV FGGVYVTGEL QTYQVEN
6165 EQPDGDYSRS QNRKVVSNHY ENLNKMNHV YGGVYVTGEL QTYQVEN
6162 EQPDGDYNS QNRKVVSNHY ENLNKMNHV YGGVYVTGEL QTYEVEN
```
